# Supplementary material for: Endoplasmic spreading requires coalescence of vimentin intermediate filaments at force-bearing adhesions
Source: PubMed Central journal article supplement — Mol Biol Cell. 2013 Jan 1;24(1):21–30. doi: 10.1091/mbc.E12-05-0377 (PMC3530776; doi:10.1091/mbc.e12-05-0377), 2013-01-01
Supplement: supp_E12-05-0377_CombinedSupMats.pdf [file supp_E12-05-0377_CombinedSupMats.pdf]

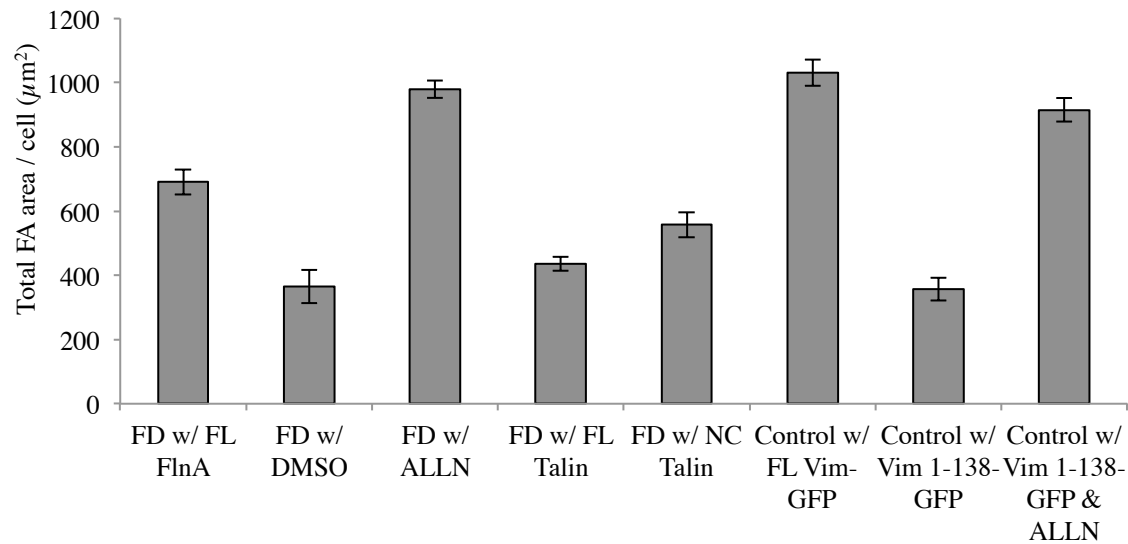

**Supplemental Figure 1: Average areas of individual peripheral focal adhesions correlate with total focal adhesion areas.** Total focal adhesion area measurements were generated for each cell type shown in Figures 1E, 2F, and 3I by thresholding paxillin signal and deleting the central non-adhesive background. For each cell type,  $n = >13$  cells, at least 3 experiments per cell type.

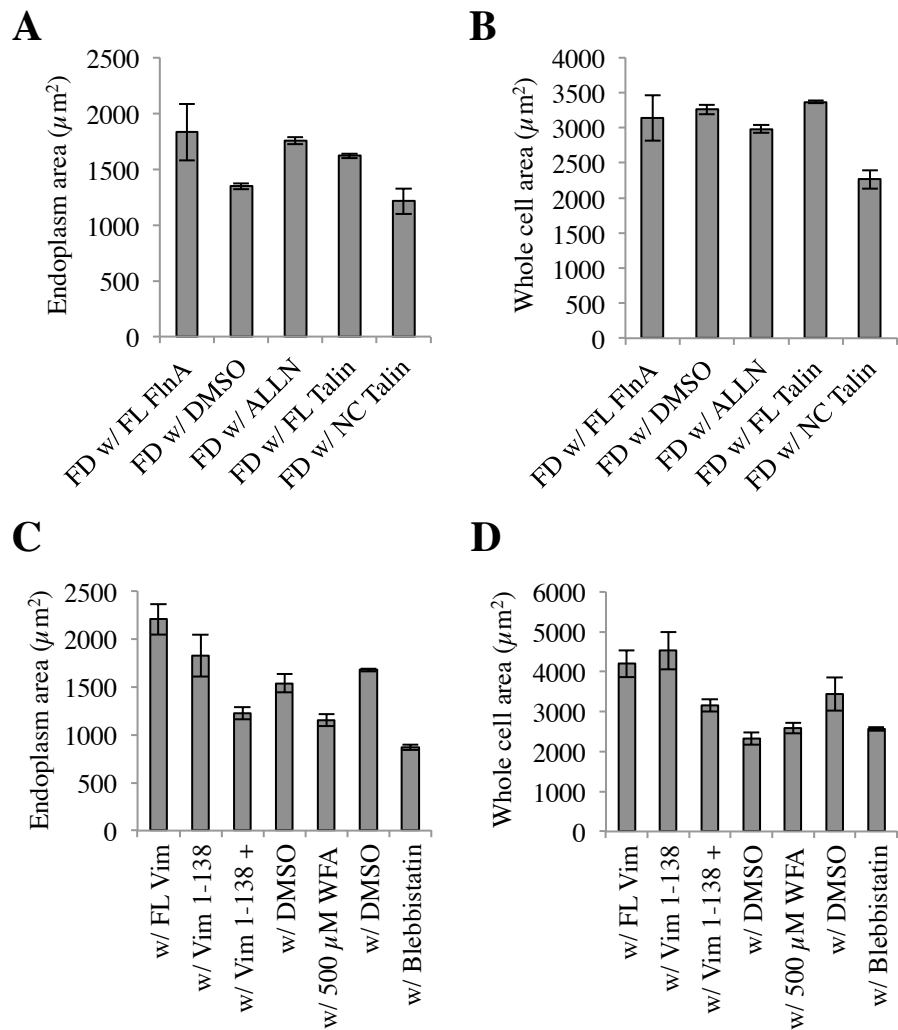

**Supplemental Figure 2: Absolute values of endoplasm and whole cell areas.**

A) Endoplasm areas that were used to compute endoplasm/whole cell area ratios from Figures 1I and 2C are shown. B) Same as A, but instead showing whole cell areas. C) Endoplasm areas that were used to compute endoplasm/whole cell area ratios from Figures 3H, 4D, and 6B are shown. D) Same as C, but instead showing whole cell areas. Values from A and B are from Fln-depleted MEFs, treated as labeled. Values from C and D are from control cells treated as labeled.

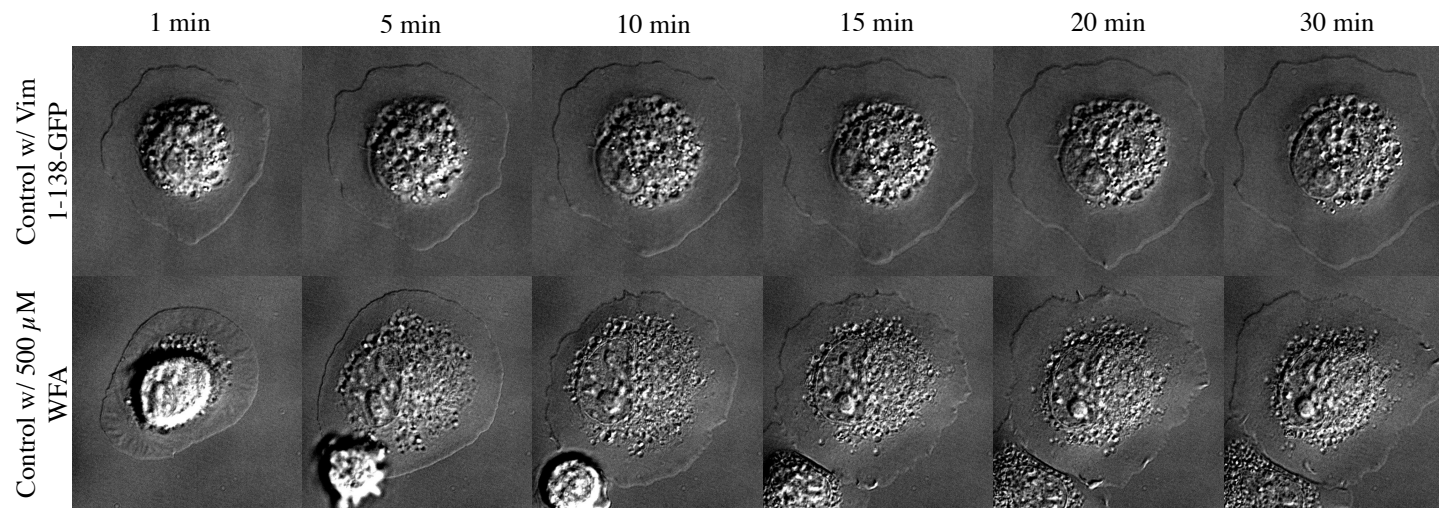

**Supplemental Figure 3: Cells exposed to vimentin inhibitors exhibit continuous spreading of the edge without rounding up.** A) Control MEFs were transfected with Vim 1-138-GFP overnight, trypsinized, resuspended, and spread on FN-coated glass for 30 minutes. B) Control MEFs were incubated for 22 hours in 500 $\mu$ M Withaferin A, trypsinized, resuspended, and spread on FN-coated glass for 30 minutes. Neither treatment resulted in cells rounding up during the spreading process.

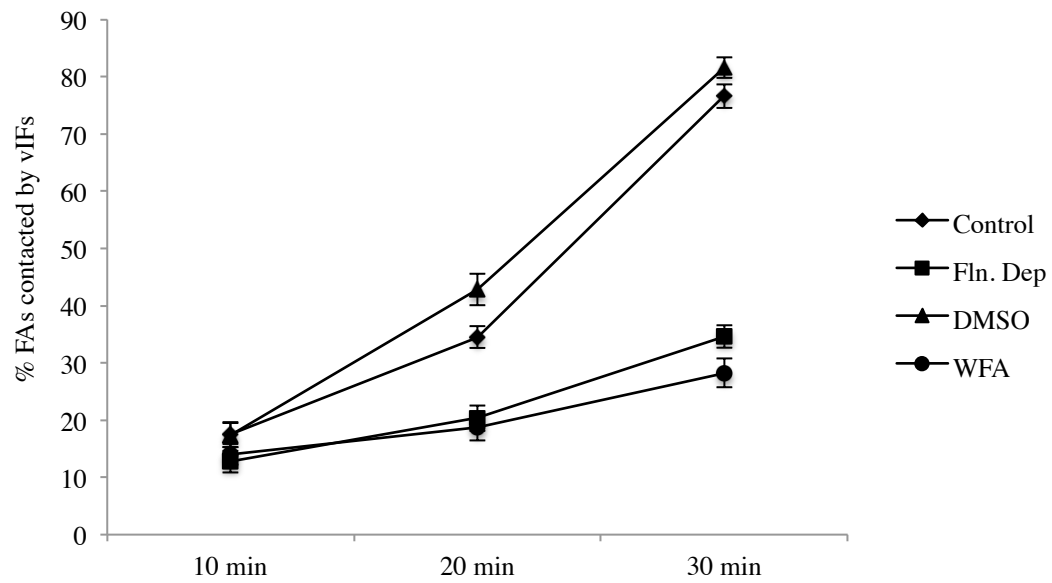

**Supplemental Figure 4: Vimentin intermediate filaments contact focal adhesions throughout cell spreading.** Each cell type was plated on FN-coated glass for 30 minutes, fixed, and stained for vimentin and paxillin. FA plaques co-localizing with vIF tips were quantified as a percentage of total FA plaques (13 cells per cell type per time point).
